# Supplementary material for: The impact of VR environment for elderly short-form video viewers on flow and mental workload
Source: Research Square preprint supplement (doi:10.21203/rs.3.rs-6286033/v1), 2025-05-16
Supplement: Supplementary file 1 [file ac7b28534a519bff1d9b45fd.docx]

**The impact of VR environment for elderly short-form video viewers on flow and mental workload**

*Zhichuan Tang1,2***, Yingjia Ding1, Ruoshen Tang 1, Lufang Zhang1, Nuo Chen1*

1. Industrial Design Institute, Zhejiang University of Technology, Hangzhou, 310023, China

2. Modern Industrial Design Institute, Zhejiang University, Hangzhou, 310007, China

*Corresponding author. E-mail: ztang@zjut.edu.cn

**AUTHOR DETAILS：**

**Zhichuan Tang**

E-mail: ztang@zjut.edu.cn

**Yingjia Ding**

E-mail: Dddings.1012@gmail.com

**Ruoshen Tang**

E-mail: 221124150096@zjut.edu.cn

**Lufang Zhang**

E-mail: zhanglf@zjut.edu.cn

**Nuo Chen**

E-mail: chennuo1822@gmail.com

**DECLARATIONS**

**Funding:** This work was supported by the National Social Science Fund of China (No. 22CTQ016).

**Table 1. Chinese version of scales**

| **Constructs** | **Items** |
| --- | --- |
| Vividness | Viv1: I think the sensory information provided by the screen was highly vivid.  我觉得屏幕上的画面非常生动 |
| Viv2: I think the sensory information provided by the screen was highly rich.  我觉得屏幕上的画面非常丰富 |
| Viv3: I think the sensory contents provided by the screen was highly detailed.  我觉得屏幕上的画面非常精细 |
| Interactivity | Int1: I felt that I had a lot of control over my experiences of watching short-form videos.  我对于看短视频的体验感到很强的控制感 |
| Int2: I think watching short-form videos was fun.  短视频的互动很有趣 |
| Int3: The short-form videos processed my input very quickly.  短视频的互动响应很快 |
| Telepresence | Tel1: I forgot about my physical location.  我觉得我忘记自己在哪里了 |
| Tel2: I felt I was in the scene of the short-form videos.  我觉得我就在短视频的场景里 |
| Tel3: I felt my mind was inside the short-form videos.  我觉得我的思绪还在短视频里 |
| Flow Experience | FE1: When I was watching short-form videos, I felt totally captivated.  浏览短视频时，我看得很着迷 |
| FE2: When I was watching short-form videos, nothing seemed to matter to me.  浏览短视频时，我不知道周围发生的事情 |
| FE3: When I was watching short-form videos, time seemed to pass very quickly.  浏览短视频时，我感觉时间过得很快 |
| FE4: When I was watching short-form videos, I found the activities interesting.  浏览短视频时，我感觉很感兴趣 |
| Mental Workload | MW1: I think the content of the short-form videos was not easy to be comprehended.  短视频的内容很难理解 |
| MW2: I think the presentation of the short-form videos requires strenuous efforts.  短视频的呈现需要额外的努力 |
| MW3: I think I put a lot of effort into watching short-form videos.  看短视频时，我付出了很大的努力 |
| WM4: When I was watching short-form videos, I felt a great burden.  看短视频时，我感受到很大的负担 |
| Satisfaction | Sat1: I was satisfied with these short-form videos.  我对这次短视频的内容很满意 |
| Sat2: I was satisfied with my viewing experience.  我对这次短视频的体验很满意 |
| Sat3: After watching short-form videos, I was pleased.  看完后我很愉悦 |
